# Supplementary material for: Reproducibility of radiomics quality score: an intra- and inter-rater reliability study
Source: PubMed Central journal article supplement (PMC10957586; doi:10.1007/s00330-023-10217-x), 2023-09-21
Supplement: 330_2023_10217_MOESM1_ESM.pdf [file 330_2023_10217_MOESM1_ESM.pdf]

# Reproducibility of radiomics quality score: an intra- and inter-rater reliability study

## Electronic Supplementary Material

**Table E1.** Table shows the final survey responses of all raters.

| Rater      | Item #1 | Item #2 | Item #3 | Item #4 | Item #5 | Item #6 | Item #7 | Item #8 | Item #9 | Item #10 | Item #11 | Item #12 | Item #13 | Item #14 | Item #15 | Item #16 |
|------------|---------|---------|---------|---------|---------|---------|---------|---------|---------|----------|----------|----------|----------|----------|----------|----------|
| 1 (F.V.)   | 1       | 1       | 1       | 1       | 1       | 1       | 1       | 1       | 2       | 3        | 1        | 1        | 2        | 1        | 2        | 2        |
| 2 (I.A.)   | 1       | 1       | 1       | 1       | 1       | 1       | 1       | 1       | 2       | 2        | 1        | 2        | 1        | 1        | 2        | 2        |
| 3 (E.A.P)  | 1       | 1       | 1       | 1       | 1       | 3       | 2       | 1       | 1       | 1        | 1        | 1        | 2        | 1        | 1        | 1        |
| 4 (S.C.F.) | 1       | 1       | 1       | 1       | 1       | 1       | 1       | 3       | 2       | 2        | 1        | 2        | 1        | 2        | 2        | 1        |
| 5 (A.B.)   | 1       | 1       | 1       | 2       | 1       | 2       | 2       | 1       | 1       | 1        | 1        | 1        | 2        | 1        | 1        | 1        |
| 6 (R.Ca.)  | 1       | 1       | 1       | 2       | 2       | 2       | 2       | 2       | 2       | 3        | 1        | 1        | 3        | 2        | 2        | 3        |
| 7 (L.U.)   | 1       | 2       | 1       | 1       | 1       | 1       | 2       | 2       | 2       | 2        | 1        | 2        | 3        | 2        | 1        | 1        |
| 8 (M.K.)   | 2       | 1       | 1       | 1       | 1       | 1       | 2       | 1       | 1       | 1        | 1        | 2        | 1        | 1        | 1        | 1        |
| 9 (A.S.)   | 0       | 2       | 1       | 1       | 1       | 1       | 1       | 2       | 1       | 1        | 1        | 1        | 2        | 1        | 1        | 1        |

Item score key: 1. very clear and easily understandable. 1. a little challenging to understand. 3. very difficult to understand.
